# Supplementary material
Source: ML conference proceedings conference paper supplement (https://www.ecva.net/papers/eccv_2020/papers_ECCV/html/123530664_ECCV_2020_paper.php)

## My Development Environment

1. python3.5
2. cuda 10.0
3. tensorflow 1.13

## Visualization Tutorial

1. tensorboard --logdir ./DOTA\_LOG --port 6006
2. Enter address in browser: <http://localhost:6006>
3. Set the parameters as shown in the red box below:

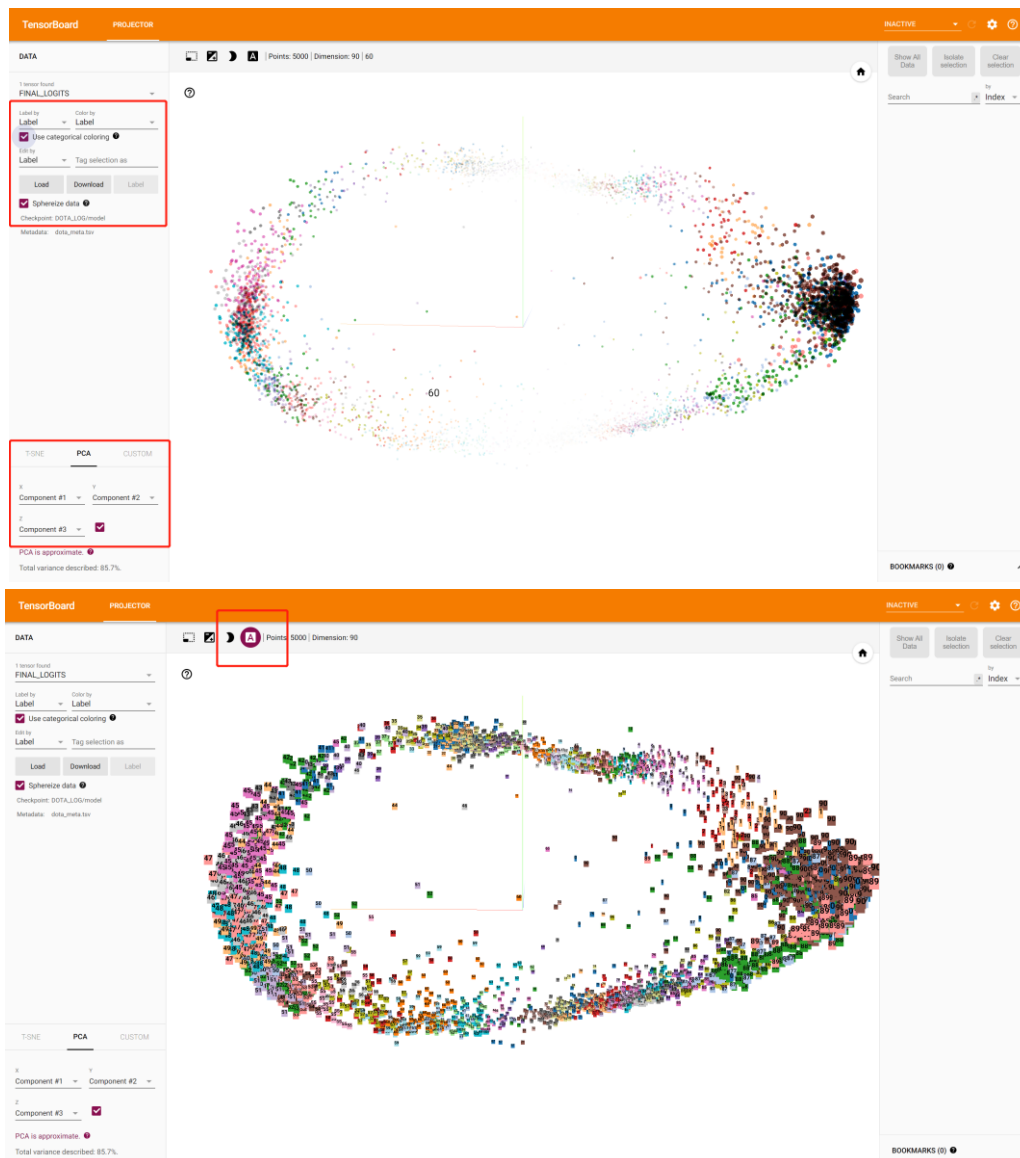

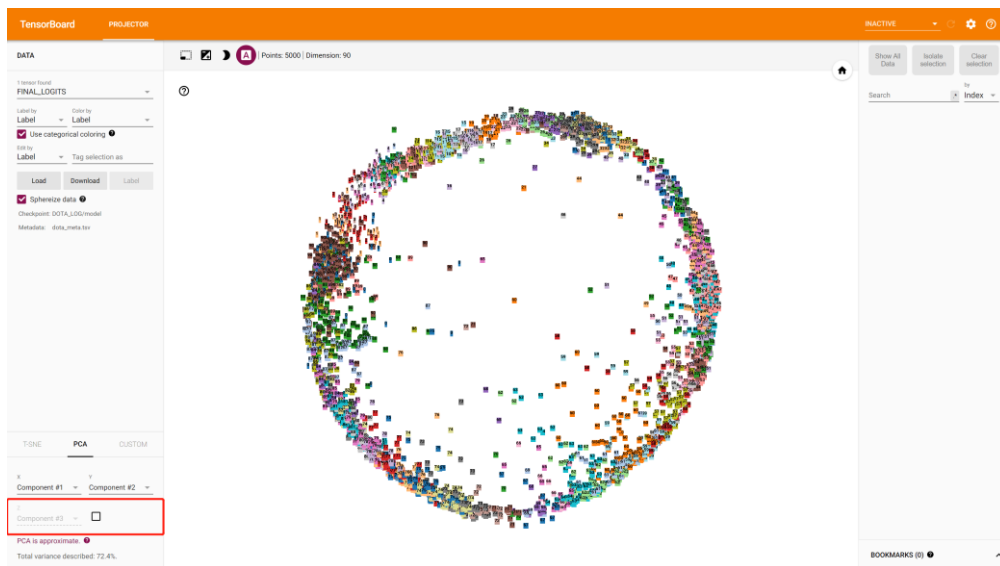

#### 4. Set bin

Load → Choose file

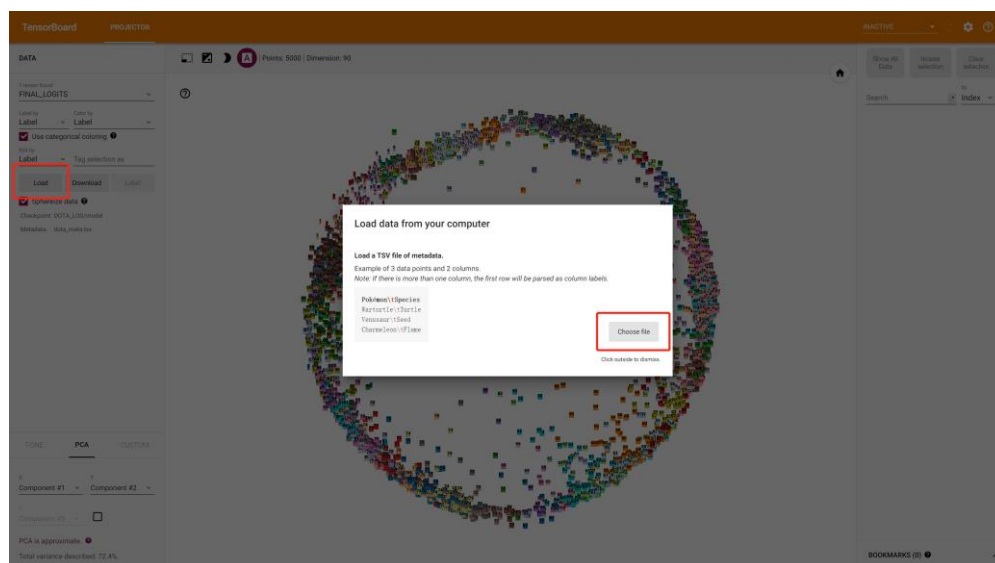

Choose dota\_meta\_{bin}.tsv from ./DOTA\_LOG

|                           |                |
|---------------------------|----------------|
| checkpoint                | 2020/3/8 20:44 |
| dota_meta.tsv             | 2020/2/5 18:37 |
| dota_meta_1.tsv           | 2020/2/6 19:28 |
| dota_meta_2.tsv           | 2020/2/5 19:34 |
| dota_meta_4.tsv           | 2020/2/5 19:34 |
| dota_meta_6.tsv           | 2020/2/5 19:34 |
| dota_meta_8.tsv           | 2020/2/5 19:34 |
| dota_meta_10.tsv          | 2020/2/5 19:33 |
| dota_meta_15.tsv          | 2020/2/5 19:32 |
| dota_meta_30.tsv          | 2020/2/5 19:31 |
| final_logits.npy          | 2020/2/5 18:37 |
| model.data-00000-of-00001 | 2020/3/8 20:44 |
| model.index               | 2020/3/8 20:44 |
| model.meta                | 2020/3/8 20:44 |
| projector_config.pbtxt    | 2020/3/8 20:44 |

Take ./DOTA\_LOG/dota\_meta\_6.tsv for example:

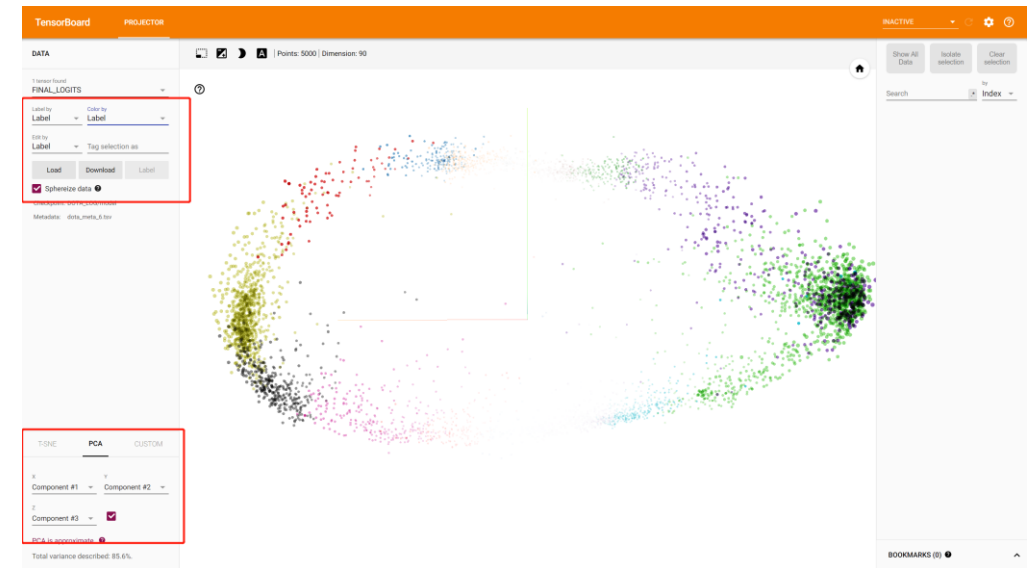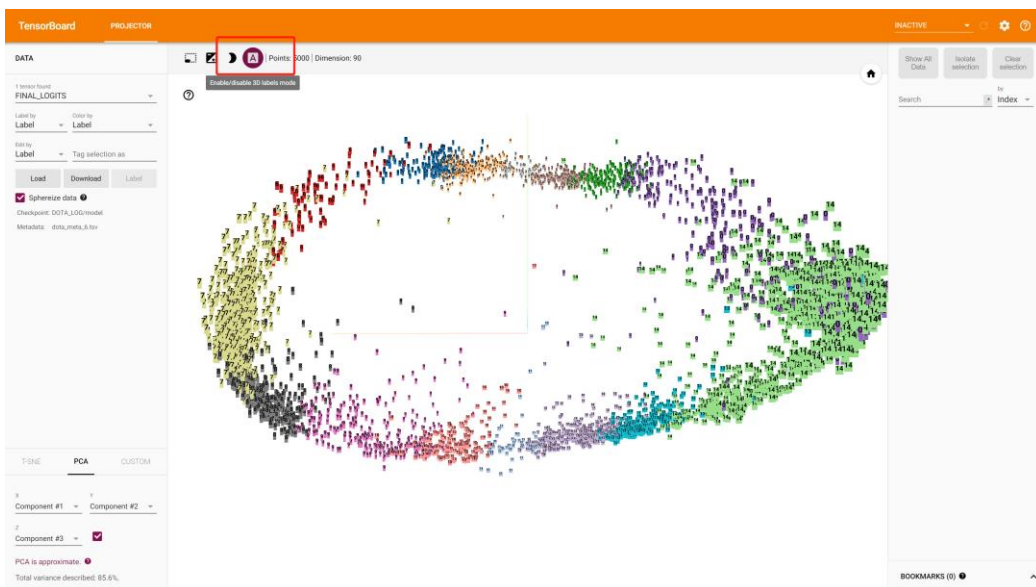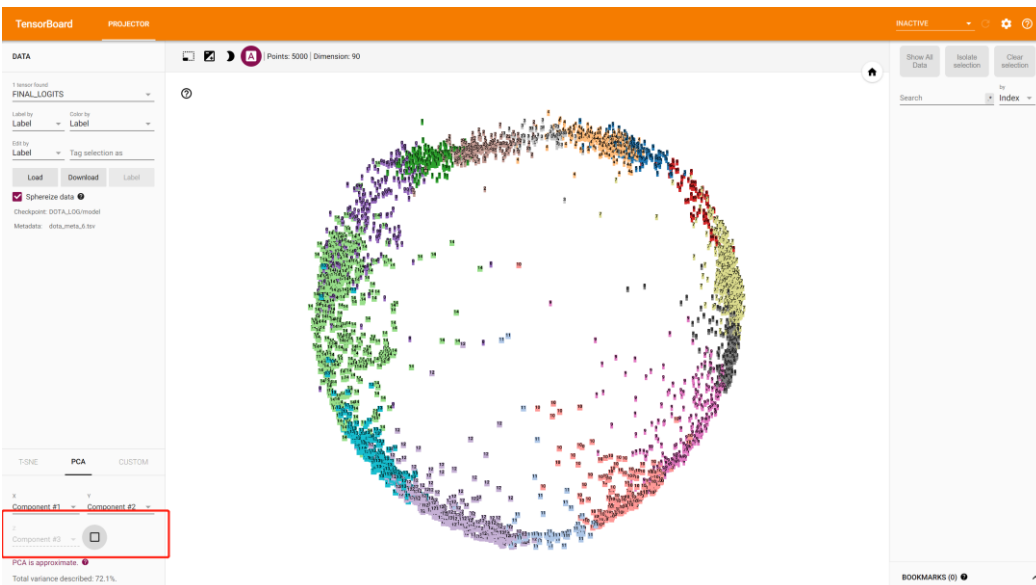

Supplement: Supplementary file 1 [file 123530664-supp.zip]
